# Supplementary material for: Spatial Spillover Effects of Resource Misallocation on the Green Total Factor Productivity in Chinese Agriculture
Source: MDPI journal article supplement (doi:10.3390/ijerph192315718), 2022-11-25
Supplement: s1 [file s1]

**Table S1.** Fertilizer loss rate in different regions.

| Code | Region                                                                                       | Loss rate |      |
|------|----------------------------------------------------------------------------------------------|-----------|------|
|      |                                                                                              | TN        | TP   |
| I    | Jiangsu, Beijing                                                                             | 0.3       | 0.07 |
| II   | Tianjin, Guangdong, Zhejiang, Shanghai                                                       | 0.3       | 0.04 |
| III  | Hubei, Fujian, Shandong                                                                      | 0.2       | 0.07 |
| IV   | Hebei, Shaanxi, Liaoning, Yunnan, Ningxia, Hunan, Jilin, Inner Mongolia, Guizhou             | 0.2       | 0.04 |
| V    | Henan, Heilongjiang                                                                          | 0.1       | 0.07 |
| VI   | Anhui Hainan, Xinjiang, Shanxi, Guangxi, Gansu, Sichuan, Jiangxi, Chongqing, Qinghai, Xizang | 0.1       | 0.04 |

Note: TN denotes total nitrogen, TP denotes total phosphorus.

**Table S2.** Pollution production coefficient of main crops ( $10^{-5}$ t/t).

| Type      | COD     | TN       | TP     |
|-----------|---------|----------|--------|
| Rice      | 3.1674  | 3.3872   | 0.0407 |
| Wheat     | 4.0807  | 2.6523   | 0.1854 |
| Corn      | 12.6158 | 11.4233  | 1.3097 |
| Vegetable | 7.6500  | 0.2484   | 0.1350 |
| Oil crops | 42.3043 | 206.3703 | 2.1438 |
| Soybean   | 31.0165 | 49.4173  | 1.1491 |
| Potato    | 0.5101  | 0.3349   | 0.1022 |

Note: COD denotes chemical oxygen demand, TN denotes total nitrogen, TP denotes total phosphorus.

**Table S3.** Nutrient loss rate of agricultural waste in different provinces (%).

| Province       | COD   | TN    | TP    |
|----------------|-------|-------|-------|
| Beijing        | 3.78  | 3.6   | 3.89  |
| Tianjin        | 3.78  | 3.6   | 3.89  |
| Hebei          | 16.41 | 14.05 | 10.13 |
| Liaoning       | 8.27  | 6.72  | 3.75  |
| Shanghai       | 11.21 | 8.82  | 4.79  |
| Jiangsu        | 10.38 | 8.79  | 6.32  |
| Zhejiang       | 7.83  | 6.64  | 4.37  |
| Fujian         | 9.25  | 7.48  | 5.05  |
| Shandong       | 11.57 | 10.39 | 8.61  |
| Guangdong      | 10.18 | 8.11  | 4.73  |
| Shanxi         | 13.24 | 10.46 | 5.24  |
| Jiangxi        | 14.02 | 10.77 | 4.46  |
| Jilin          | 8.27  | 6.72  | 3.75  |
| Anhui          | 7.51  | 6     | 4.43  |
| Heilongjiang   | 9.12  | 7.37  | 4.15  |
| Henan          | 9.97  | 8.24  | 5.3   |
| Hubei          | 8.05  | 6.15  | 2.35  |
| Hunan          | 15.2  | 11.65 | 4.77  |
| Sichuan        | 4.66  | 3.95  | 2.83  |
| Inner Mongolia | 0     | 0     | 0     |
| Guangxi        | 10.18 | 8.11  | 4.73  |
| Guizhou        | 8     | 7.25  | 8.75  |
| Yunnan         | 3.78  | 3.6   | 3.89  |

|           |       |       |      |
|-----------|-------|-------|------|
| Shaanxi   | 11.75 | 10.15 | 7.59 |
| Gansu     | 9.06  | 7.72  | 5.21 |
| Qinghai   | 0     | 0     | 0    |
| Ningxia   | 3.15  | 2.8   | 2.85 |
| Xinjiang  | 0     | 0     | 0    |
| Hainan    | 10.1  | 8.2   | 6.9  |
| Chongqing | 4.66  | 3.95  | 2.83 |
| Xizang    | 4.66  | 3.95  | 2.83 |

Note: COD denotes chemical oxygen demand, TN denotes total nitrogen, TP denotes total phosphorus.

**Table S4.** Variables and definition

| Variable symbol | Variable name                   | Variable definition                                                                      |
|-----------------|---------------------------------|------------------------------------------------------------------------------------------|
| Y               | Expected output                 | Total agricultural output is deflated by the 1978 price index of primary industry output |
| TN              | Unexpected output               | Total nitrogen                                                                           |
| TP              | Unexpected output               | Total phosphorus                                                                         |
| COD             | Unexpected output               | Chemical oxygen demand                                                                   |
| L               | Land                            | The total sown area of crops                                                             |
| N               | Labor                           | The number of people employed in agriculture                                             |
| M               | Machinery                       | The total power of agricultural machinery                                                |
| F               | Fertilizer                      | The discounted amount of fertilizer                                                      |
| GTFP            | Green total factor productivity | Calculated by sequential DEA                                                             |
| Mis_L           | Land misallocation              | Calculated by Equation (17)                                                              |
| Mis_N           | Labor misallocation             | Calculated by Equation (17)                                                              |
| Mis_M           | Machinery misallocation         | Calculated by Equation (17)                                                              |
| Mis_F           | Fertilizer misallocation        | Calculated by Equation (17)                                                              |
| RPP             | Rural population proportion     | The ratio of the rural population to the total population                                |
| PGDP            | Per capita GDP                  | The ratio of GDP to the total population                                                 |
| PD              | Population density              | The number of people per square kilometre                                                |
| ER              | Environmental regulation        | The number of environmental protection establishments at the end of the year             |
| Patent          | Technological innovation        | The number of domestic patent applications                                               |
| FDI             | Foreign direct investment       | The foreign direct investment (USD 10000)                                                |

**Table S5.** Descriptive statistics of variables.

| Variable | Unit               | N    | Mean     | St. Dev. | Min    | Max      |
|----------|--------------------|------|----------|----------|--------|----------|
| Y        | 100 million yuan   | 6732 | 18.515   | 16.593   | 0.47   | 75.482   |
| TN       | t                  | 6732 | 15812.95 | 20327.9  | 56.741 | 113611.8 |
| TP       | t                  | 6732 | 937.176  | 1424.764 | 5.04   | 8462.468 |
| COD      | t                  | 6732 | 21.846   | 25.704   | 0.077  | 127.171  |
| L        | Hectare            | 6732 | 375173.5 | 304534.2 | 6460   | 1351317  |
| N        | 10 thousand people | 6732 | 46.924   | 40.871   | 0.942  | 213.344  |
| M        | KW/h               | 6732 | 1896771  | 1852856  | 55238  | 9888656  |
| F        | t                  | 6732 | 153317.5 | 175508.6 | 1103   | 1002894  |
| GTFP     | -                  | 6732 | 0.702    | 0.251    | 0.239  | 1.649    |
| Mis_L    | -                  | 6732 | 0.655    | 0.708    | 0.008  | 0.438    |
| Mis_N    | -                  | 6732 | 0.656    | 0.798    | 0.009  | 0.443    |

|        |                         |      |          |          |        |          |
|--------|-------------------------|------|----------|----------|--------|----------|
| Mis_M  | -                       | 6732 | 0.655    | 0.738    | 0.011  | 0.435    |
| Mis_F  | -                       | 6732 | 0.747    | 0.897    | 0.01   | 0.491    |
| RPP    | -                       | 6732 | 60.453   | 20.258   | 8.002  | 90.53    |
| PGDP   | 10 thousand yuan/people | 6732 | 0.553    | 0.577    | 0.027  | 4.677    |
| PD     | People/km <sup>2</sup>  | 6732 | 339.405  | 276.827  | 0.001  | 1161.109 |
| ER     | Piece                   | 6732 | 465.968  | 230.57   | 52     | 1145     |
| Patent | Piece                   | 6732 | 37452.52 | 81614.46 | 97     | 504500   |
| FDI    | 100 million yuan        | 6732 | 1309.323 | 2072.411 | 12.732 | 9461.904 |
